# Supplementary material for: Unveiling Transboundary Challenges in The Ciliwung River Flood Management
Source: Copernicus journal article supplement (doi:10.5194/nhess-2023-85), 2023-06-12
Supplement: Supplementary file [file nhess-2023-85-RC3-supplement.pdf]

The paper comprehensively discusses the challenges of managing transboundary river flood management along the Ciliwung River Basin, which largely covers the Jakarta Metropolitan Area. While the topic is timely, several issues need to be addressed before considering the paper for publication: (1) cite more recent literature on Greater Jakarta's urbanisation and peri-urbanization/ suburbanisation, which amplify the magnitude of the floodings; (2) add some key/ critical quotes from the expert interviews in the Discussion; (3) make sense the findings by outlining its relevance for or contribution to the global literature development in the areas of transboundary river/ flood risk management; and (4) address grammatical and typo errors throughout the paper (e.g. incomplete or fragmented sentences and paragraphs, non-standard citations, incorrect table numbering/ cross-reference, use of articles).
